# Supplementary material for: A highly sensitive and selective “signal-on” electrochemiluminescent biosensor for mercury
Source: Royal Society of Chemistry journal article supplement (doi:10.1039/b926319e), 2010-01-01
Supplement: b926319e.pdf [file b926319e.pdf]

## Supporting information

### EXPERIMENTAL SECTION

**Materials and chemicals.** DNA oligonucleotides (1) and (2) were synthesized by Sangon Inc. (Shanghai, China). Their sequences are shown below:

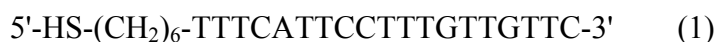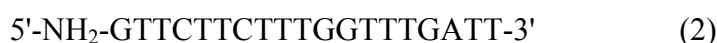

Ru(bpy)<sub>3</sub><sup>2+</sup>, tetraethyl orthosilicate (TEOS), Triton X-100 (TX-100), n-hexanol, cyclohexane, 2-(Dibutylamino)ethanol (DBAE) and 6-mercaptohexano (MCH) were purchased from Sigma, USA. All other chemicals were of analytical grade.

All solutions were prepared with using Milli-Q reagent water (Milli-Q, Millipore, 18.2-MΩ resistivity). DNA buffer solutions (the concentration of oligonucleotide is 10 μmol/L) were obtained by dissolving oligonucleotides with a 40 mmol/L Tris-HCl buffer solution (pH 7.6) containing 0.1 mol/L NaCl. Metal ion solutions were prepared from nitrate salts. All work solutions were prepared with Tris-HCl buffer solution.

The waste water samples were taken from the sewerage network near Fuzhou University, Fujian, China. Before experiment the samples collected was first filtered by a filter membrane (0.20 μm) to remove insoluble substance.

**Apparatus.** The ECL detection system consisted of a BPCL ultra-weak luminescence analyzer (Institute of Biophysics, Chinese Academy of Science, Beijing, China) and a CHI 660a electrochemical system (CH Instruments, Shanghai, China). A three-electrode electrochemical cell with an optically flat bottom was used. Gold

23 electrodes (2 mm in diameter, CH Instruments, Shanghai, China) were used as the  
24 work electrode. Platinum wire and Ag/AgCl (saturated with KCl) were used as  
25 counter and reference electrodes, respectively (shown in Fig. S1). Buffer solutions  
26 were purged with highly purified nitrogen for 20 min before measurement and kept in  
27 the cell during determinations. The electrochemical cell was placed directly in front of  
28 a photomultiplier (PMT, operated at -800 V) and the PMT window was only opened  
29 to the working electrode to reduce the interference of ECL from the counter electrode.

30 The TAS-986 Atomic Absorption Spectrometry (Beijing Purkinje General  
31 Instrument Co.LTD. Beijing, China) had been applied to test the mercury in the waste  
32 water.

33 **Ru-SNPs synthesis and surface modification. (1) Nanoparticle synthesis.**  
34 Ru-SNPs were prepared by the water-in-oil (W/O) microemulsion in the previous  
35 literature [39]. The mixture of 1.77 mL of TritonX-100, 7.5 mL of cyclohexane, 1.8  
36 mL of n-hexanol, 340  $\mu\text{L}$  of  $\text{Ru}(\text{bpy})_3^{2+}$  solution were stirred for 30 min at room  
37 temperature, forming a uniform W/O microemulsion. The water-surfactant molar ratio  
38 was kept constant at 10. Above mixture polymerizate reacted with TEOS by initiation  
39 of  $\text{NH}_4\text{OH}$  for 24 h at the room temperature. After reaction, the Ru-SNPs were  
40 isolated by acetone, followed by centrifuging, ultrasonication and washing with  
41 ethanol and deioned water several times to remove residual molecules and physically  
42 absorbed  $\text{Ru}(\text{bpy})_3^{2+}$  from the surface of the particles. Then Ru-SNPs were suspended  
43 in 2mL Tris-HCl buffer solution by ultrasonication for the following experiments.

44 **(2) Surface modification of Ru-SNPs and covalent conjugation of**

45 **oligonucleotides onto the nanoparticle surface.** According to the literature [40], we  
46 performed to functionalization of surface of Ru-SNPs. Above Ru-SNPs were  
47 immersed in freshly prepared 1% solution of DETA containing 1 mmol/L acetic acid  
48 for 30 min at room temperature and rinsed with deioned water several times to  
49 remove excess DETA.

50 The above Ru-SNPs were reacted with 5% glutaraldehyde solution in 37 °C water  
51 bath for 2 h with shaking and washed with deioned water to remove the excess  
52 glutaraldehyde thoroughly. The oligonucleotides solution was added to the  
53 functionalized SNPs solution and stirred for 120 min. Oligonucleotides conjugated  
54 nanoparticles were treated with glycine solution. At last, the product was washed and  
55 centrifuged, resuspended in Tris-HCl buffer solution (pH 7.6) and stored at 4 °C.

56 **(3) Sensor Preparation.** Gold electrodes were polished with aqueous slurries of  
57 1.0 μm, 0.3 μm and 0.05 μm α-Al<sub>2</sub>O<sub>3</sub> powders on a polishing microcloth and  
58 sonicated with deioned water, ethanol for 3 min, respectively. Finally, the electrodes  
59 were rinsed with deioned water. Then they were electrochemically activated in 0.5  
60 mol/L sulfuric acid. The activated gold electrodes were interacted with 10 nmol/L  
61 oligonucleotides(1) solution for 90min, and oligonucleotides (1) can be immobilized on  
62 the gold electrode by thiol-Au interactions. And the surfaces of the electrodes were  
63 passivated with 1mmol/L MCH. The electrodes modified oligonucleotides (1) were  
64 immersed into the 10nmol/L oligonucleotides (2) solution containing different  
65 concentrations of Hg<sup>2+</sup> for 2h in 37 °C water bath. The biosensors are obtained to  
66 determinate content of Hg<sup>2+</sup>.

67       **(4) ECL measurements.** The above treated gold electrodes, as the work electrode,  
68 were ringed with water thoroughly and then immersed into an ECL cell containing 2  
69 mL of Tris-HCl buffer solution (pH 7.6), 10  $\mu$ L 1.0 mol/L DBAE and 0.1 mol/L NaCl.  
70 The cell was laid in the dark chamber without stirring. In this work, we chose cyclic  
71 voltammetry (CV) as scan mode. A pulse potential exerted on the work electrode  
72 ranged from +0.8 V (versus Ag/AgCl) to +1.6 V. The scan rate was 50 mV/s. The  
73 height of ECL signal was used for quantification.

74

75 **Fig. S 1**

76

77

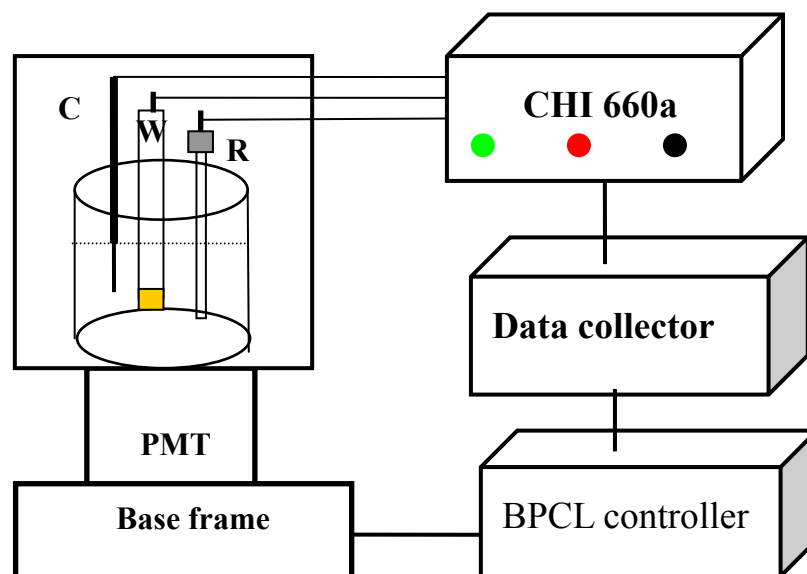

78

79

80 **Fig. S 1** The scheme of the ECL detection system.

81 C: counter electrode; W: working electrode; R: reference electrode

82
